# Supplementary material
Source: HighWire-hosted journal article supplement (https://bmjopen.bmj.com/content/15/1/e091098)

## SUPPLEMENT

### **Real-world outcomes in patients with melanoma brain metastasis: a US multisite retrospective chart review study of systemic treatments**

Isabella C. Glitza Oliva,<sup>1</sup> Jennell Palaia,<sup>2</sup> Leon A. Sakkal,<sup>2</sup> Divya Patel,<sup>2</sup> Andriy Moshyk,<sup>2</sup>  
Natalia Han,<sup>3</sup> Shardul Odak,<sup>3</sup> Jordana K. Schmier,<sup>4</sup> Ning Ning,<sup>4</sup> Sunandana Chandra<sup>5</sup>

<sup>1</sup>The University of Texas MD Anderson Cancer Center, Houston, TX, USA; <sup>2</sup>Bristol Myers Squibb, Princeton, NJ, USA; <sup>3</sup>RTI Health Solutions, Research Triangle Park, NC, USA; <sup>4</sup>Open Health, Bethesda, MD, USA; <sup>5</sup>Robert H. Lurie Comprehensive Cancer Center of Northwestern University, Chicago, IL, USA

**Supplemental table 1.** Types of radiation therapy

|                                            | Nivolumab<br>plus<br>ipilimumab<br>(n=246) | Anti-PD-1<br>monotherapy<br>(n=112) | BRAF/MEK<br>inhibitor<br>(n=114) | Overall<br>(n=472) |
|--------------------------------------------|--------------------------------------------|-------------------------------------|----------------------------------|--------------------|
| Type of first radiation<br>therapy,* n (%) | n=54                                       | n=33                                | n=40                             | n=127              |
| Stereotactic                               | 37 (69)                                    | 24 (73)                             | 33 (82)                          | 94 (74)            |
| IMRT                                       | 13 (24)                                    | 6 (18)                              | 3 (8)                            | 22 (17)            |
| 3D-CRT                                     | 4 (7)                                      | 3 (9)                               | 4 (10)                           | 11 (9)             |
| Type of second radiation<br>therapy, n (%) | n=1                                        | n=0                                 | n=4                              | n=5                |
| Stereotactic                               | 1 (100)                                    | 0                                   | 4 (100)                          | 5 (100)            |
| IMRT                                       | 0                                          | 0                                   | 0                                | 0                  |
| 3D-CRT                                     | 0                                          | 0                                   | 0                                | 0                  |

\*Two patients had two types of radiation therapy starting on the same date, and both types were accounted as the first radiation therapy.  
3D-CRT, three-dimensional conformal radiation therapy; IMRT, intensity-modulated radiation therapy; PD-1, programmed death-1.

**Supplemental figure 1.** Study design. Study recruitment employed a two-part design in which a random sample of patients with *BRAF* mutant or wild-type metastatic melanoma with brain metastases (n=250) was identified first, followed by the identification of an augment *BRAF* mutant sample (n=113) and an augment *BRAF* wild-type sample (n=125).

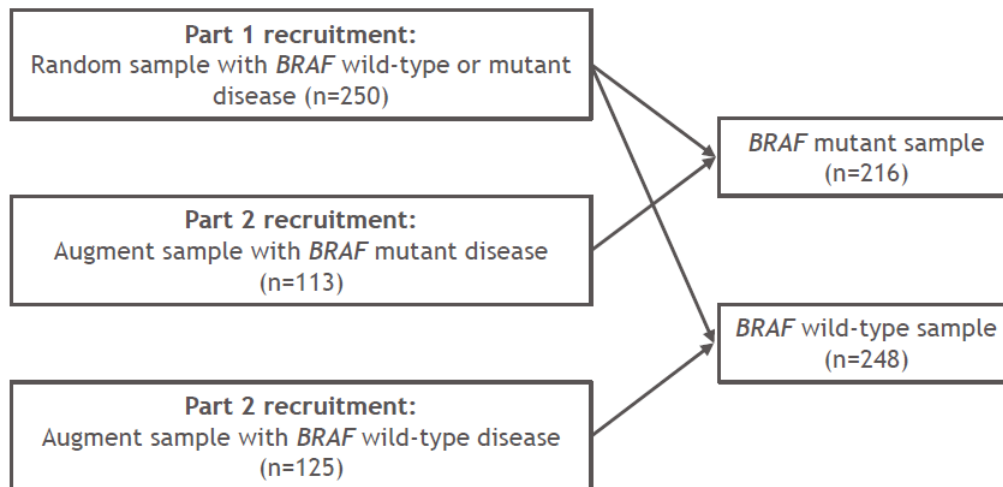

**Supplemental figure 2.** OS in patients with symptomatic MBM by first-line treatment and *BRAF* status. Shaded areas indicate 95% CIs. CI, confidence interval; HR, hazard ratio; MBM, melanoma brain metastasis; mo, month; NR, not reached; OS, overall survival; PD-1, programmed death-1.

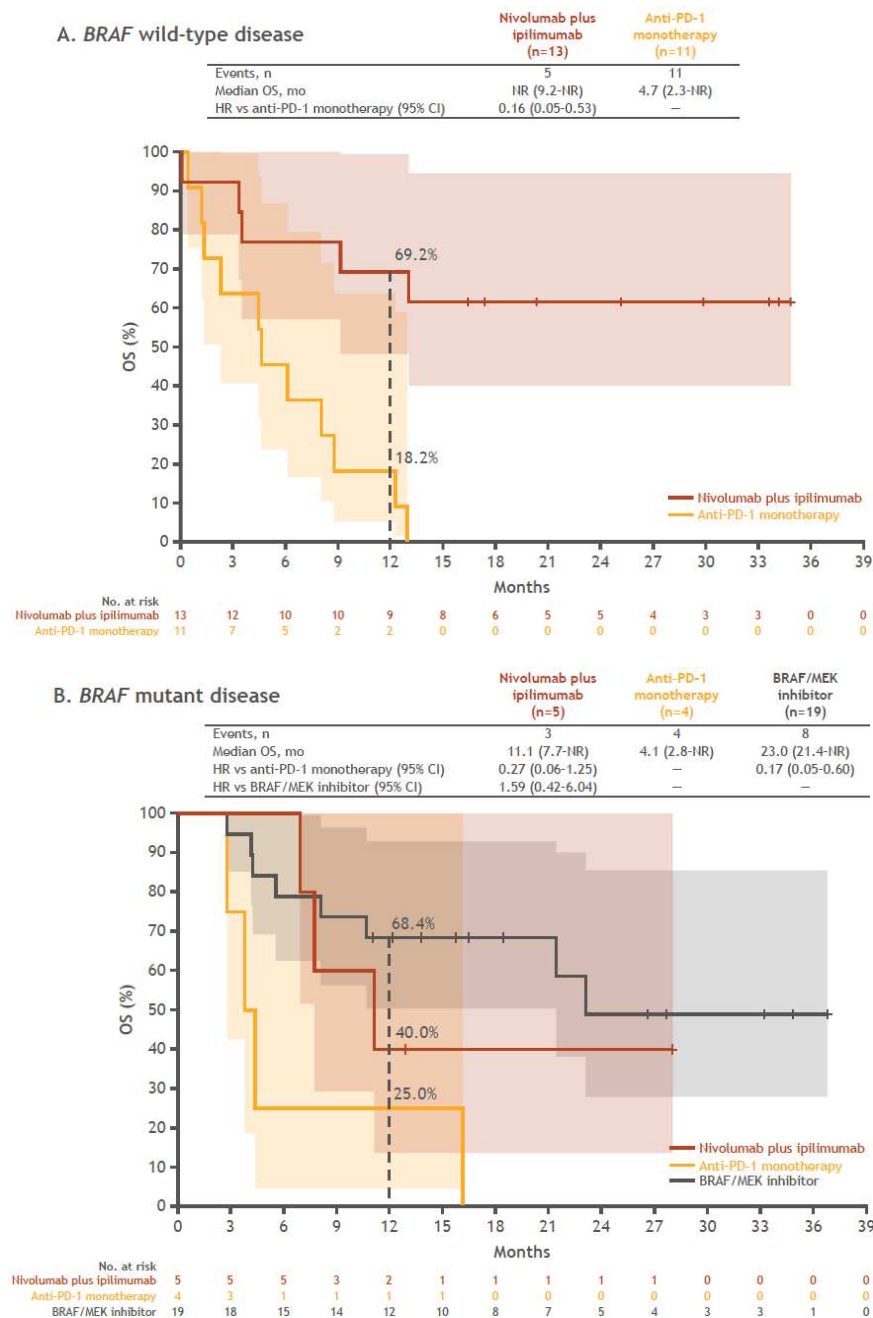

**Supplemental figure 3.** PFS in patients with symptomatic MBM by first-line treatment and *BRAF* status. Shaded areas indicate 95% CIs. CI, confidence interval; HR, hazard ratio; MBM, melanoma brain metastasis; mo, month; NR, not reached; PD-1, programmed death-1; PFS, progression-free survival.

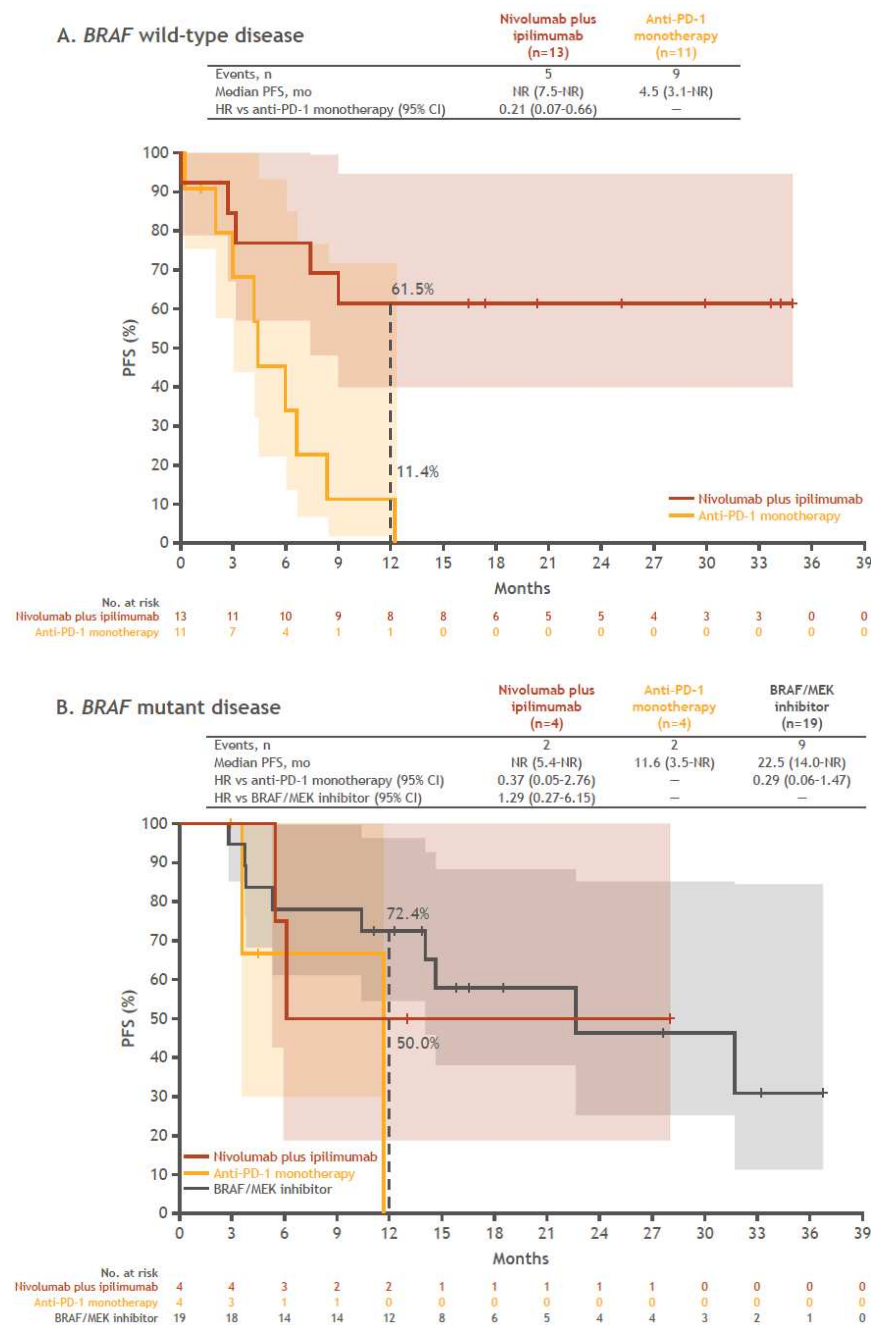

**Supplemental figure 4.** OS in patients with MBM without concurrent radiation by first-line treatment and *BRAF* status. Shaded areas indicate 95% CIs. CI, confidence interval; HR, hazard ratio; MBM, melanoma brain metastasis; mo, month; NR, not reached; OS, overall survival; PD-1, programmed death-1.

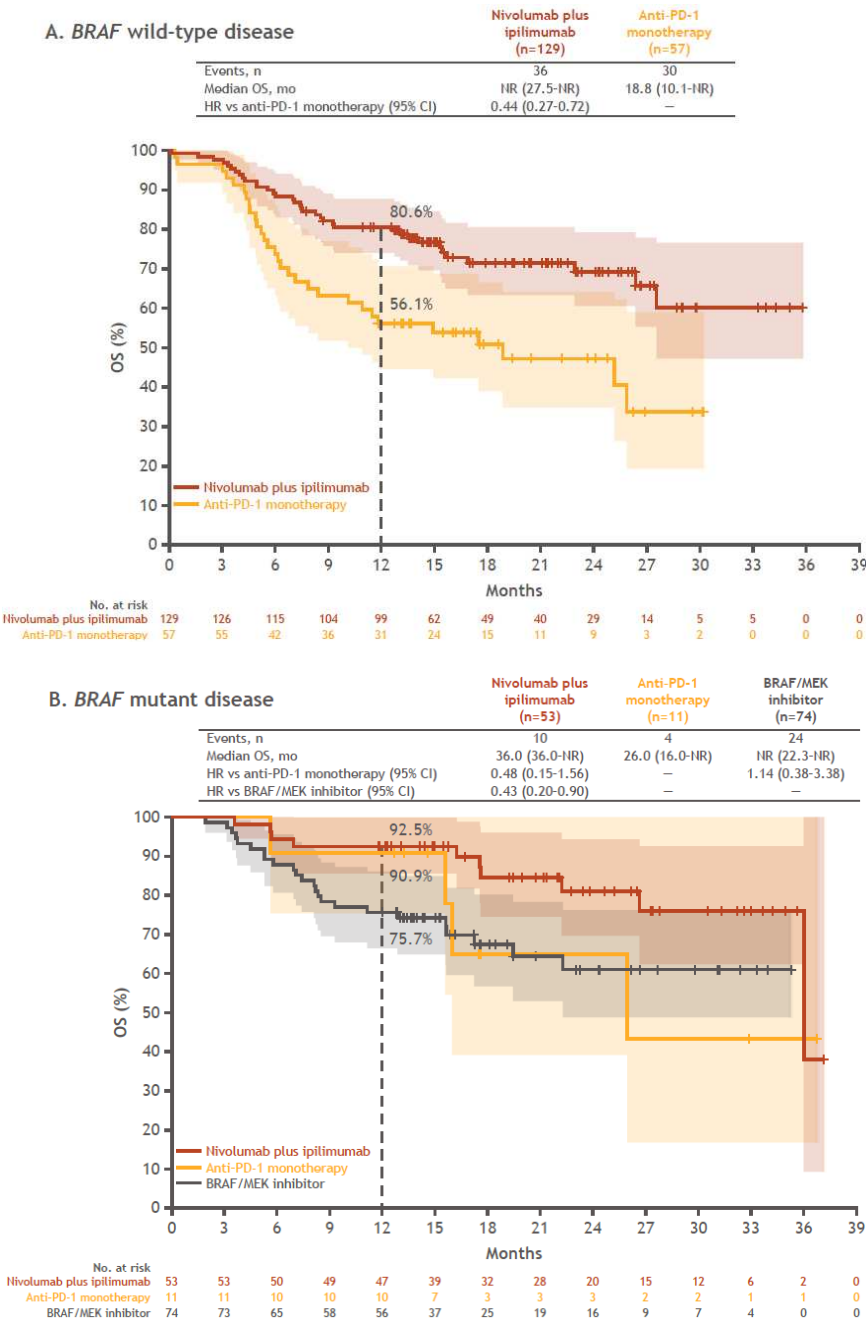

**Supplemental figure 5.** OS in patients with MBM with concurrent radiation by first-line treatment and *BRAF* status. Shaded areas indicate 95% CIs. CI, confidence interval; HR, hazard ratio; MBM, melanoma brain metastasis; mo, month; NR, not reached; OS, overall survival; PD-1, programmed death-1.

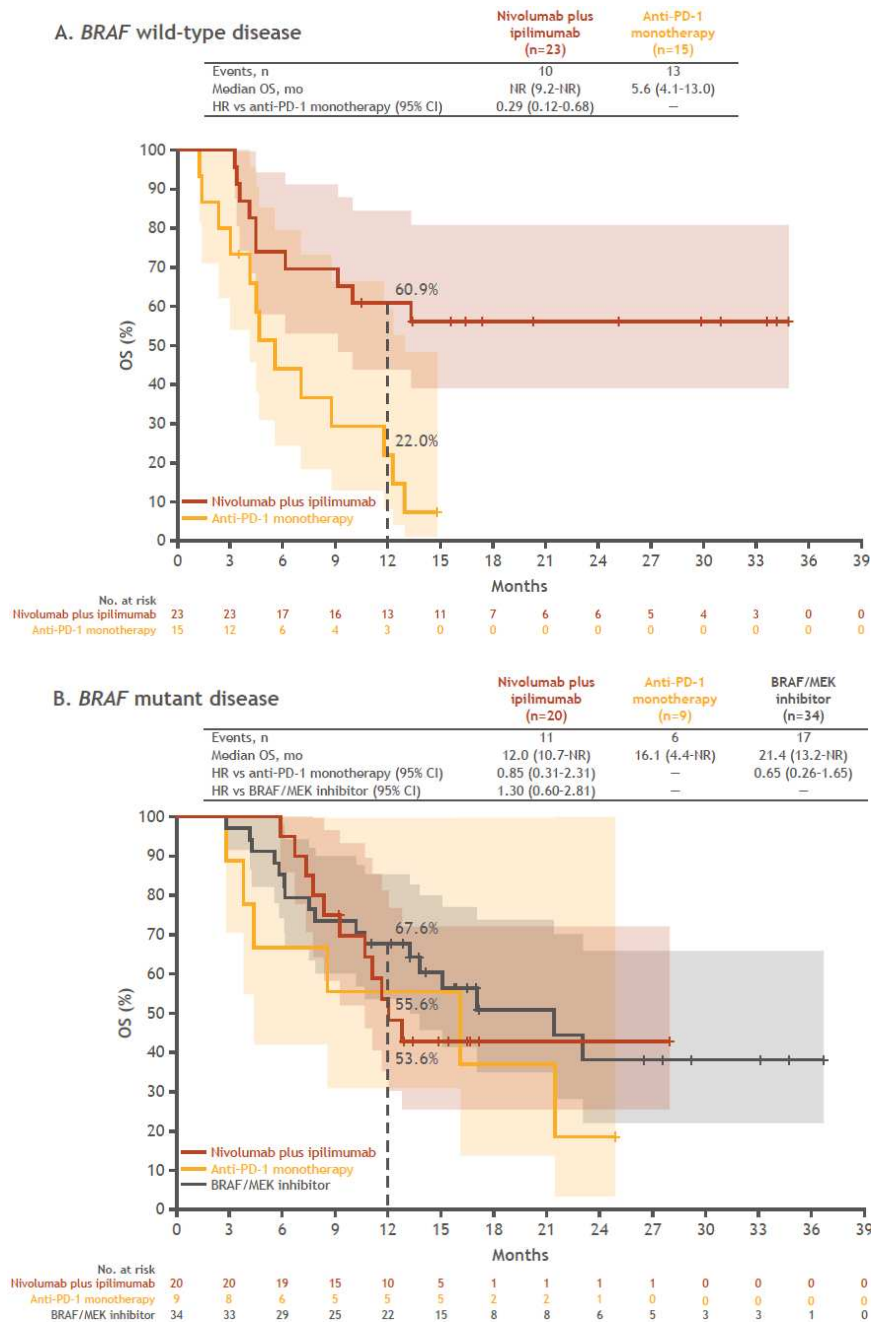

**Supplemental figure 6.** PFS in patients with MBM without concurrent radiation by first-line treatment and *BRAF* status. Shaded areas indicate 95% CIs. CI, confidence interval; HR, hazard ratio; MBM, melanoma brain metastasis; mo, month; NR, not reached; PD-1, programmed death-1; PFS, progression-free survival.

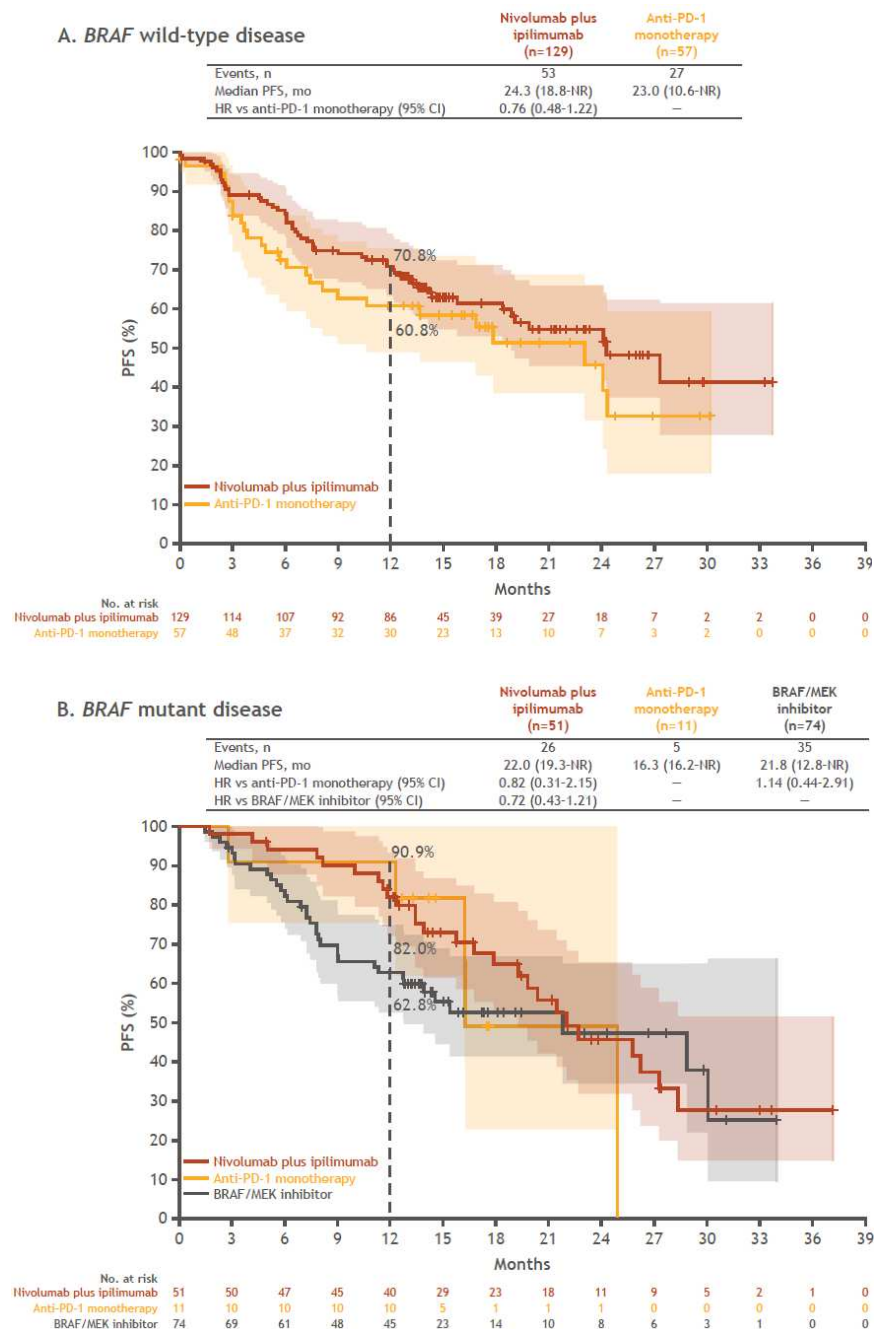



**Supplemental figure 7.** PFS in patients with concurrent radiation by first-line treatment and *BRAF* status. Shaded areas indicate 95% CIs. CI, confidence interval; HR, hazard ratio; mo, month; NR, not reached; PD-1, programmed death-1; PFS, progression-free.

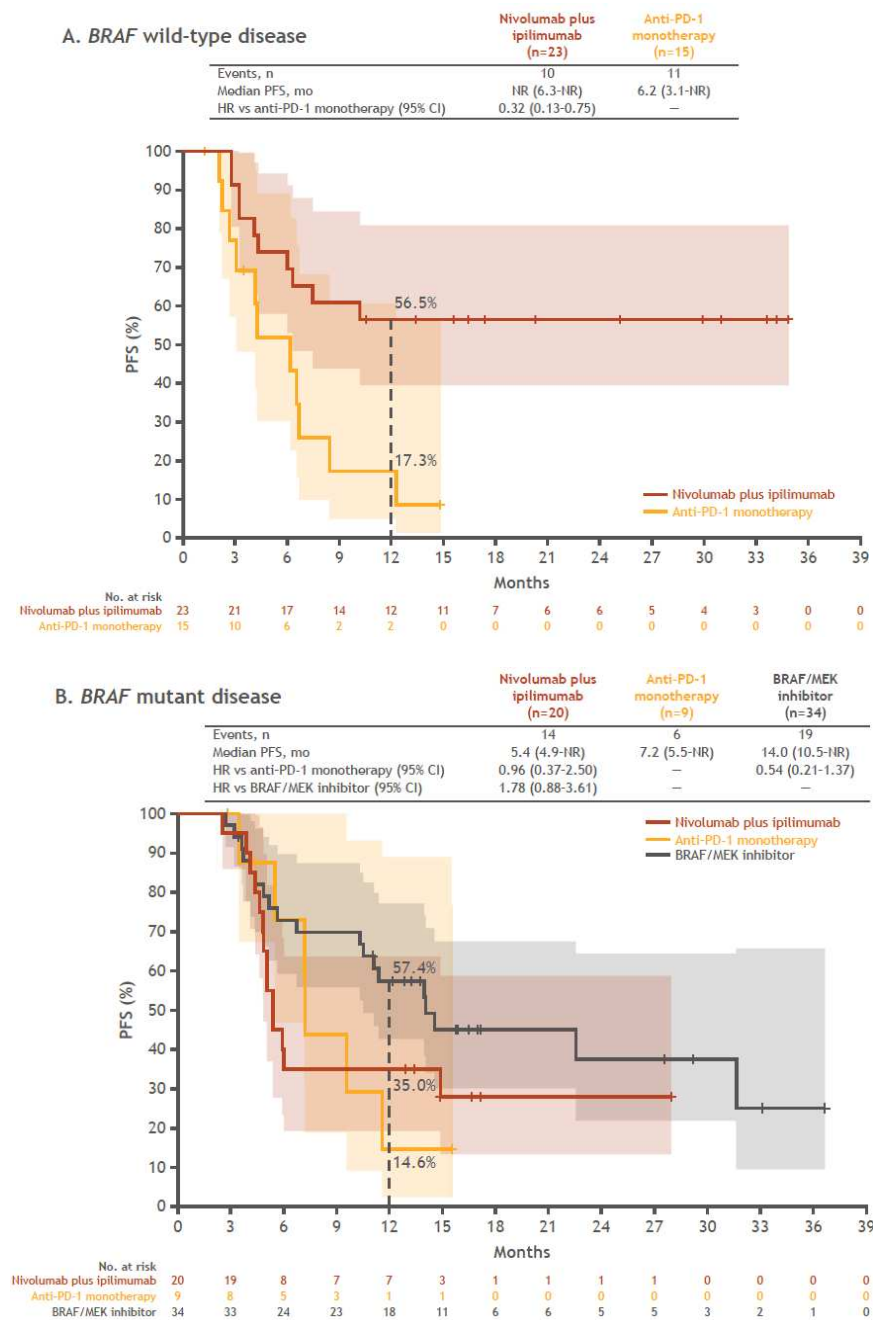

Supplement: inline-supplementary-material-1 [file inline-supplementary-material-1.pdf]
